# Supplementary material
Source: PubMed Central journal article supplement (PMC8353216)

**Supplementary file 1: Filled-up format for *Preferred Reporting Items for Systematic Reviews and Meta-Analyses (PRISMA)* guidelines.**

**PRISMA chart**

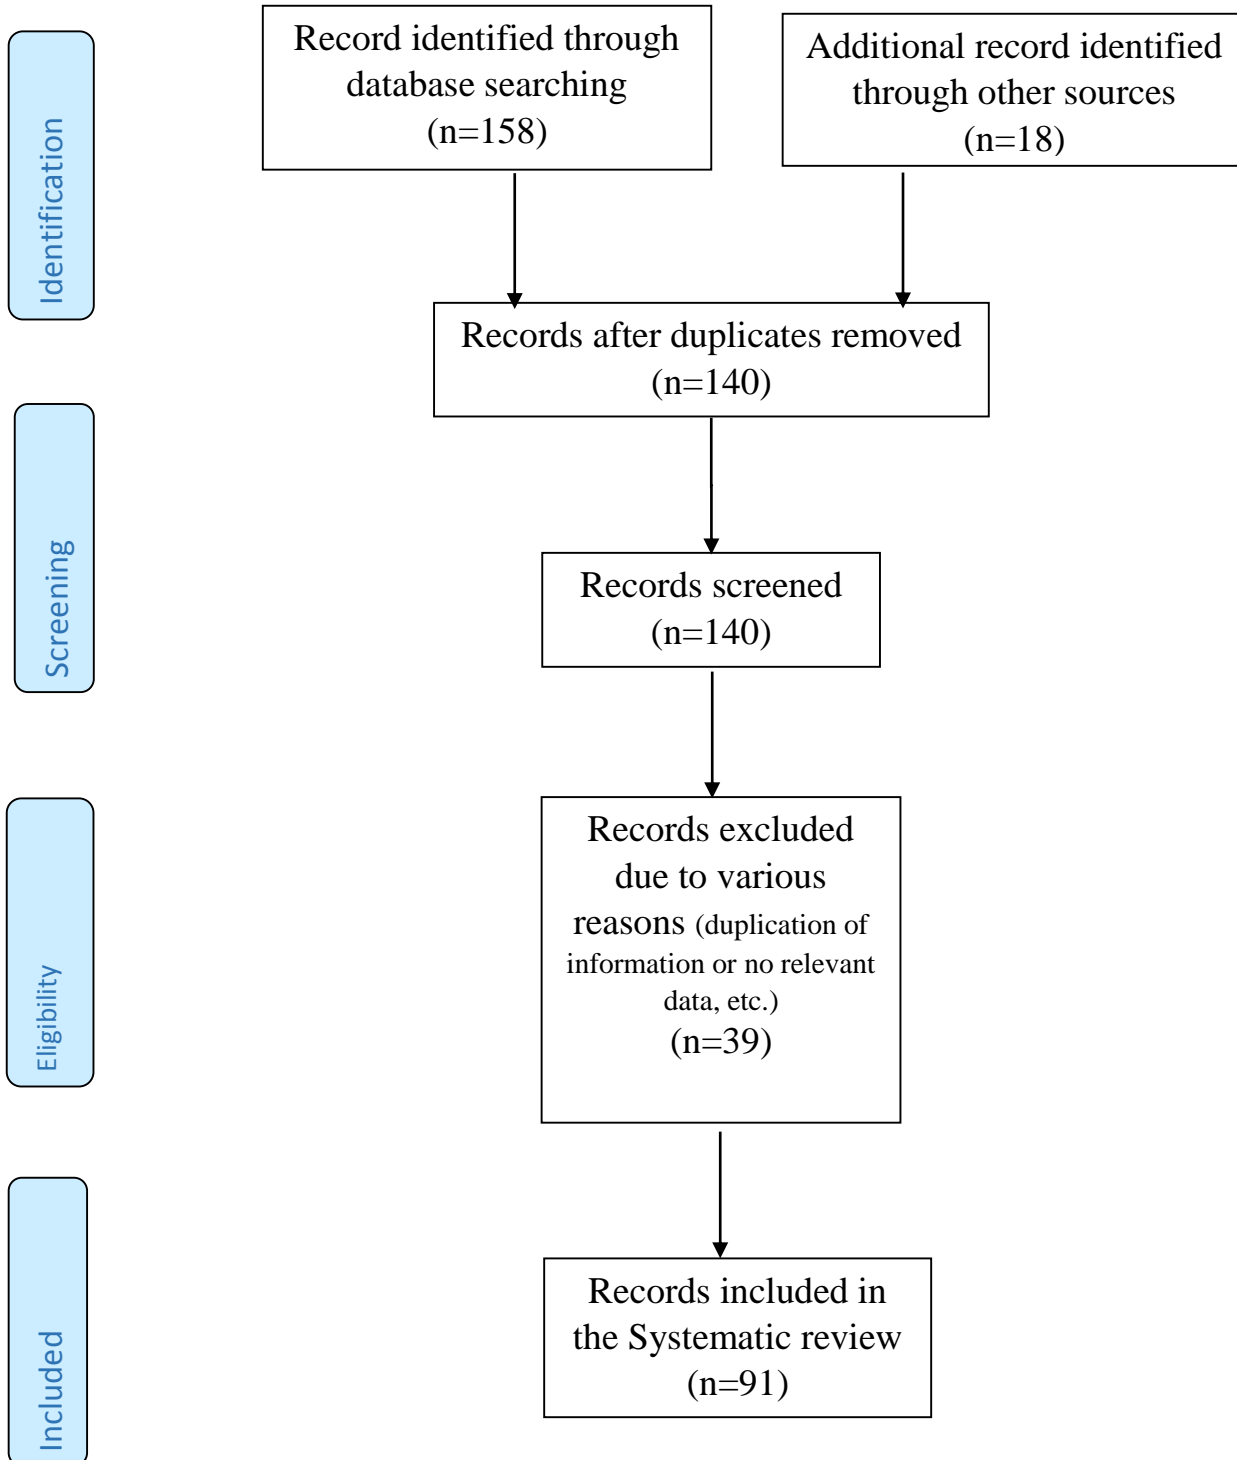

Supplement: S1462399421000090sup001.pdf [file S1462399421000090sup001.pdf]
